# Supplementary material for: Bone marrow-derived mesenchymal stem cells modulate autophagy in RAW264.7 macrophages via the phosphoinositide 3-kinase/protein kinase B/heme oxygenase-1 signaling pathway under oxygen-glucose deprivation/restoration conditions
Source: PubMed Central journal article supplement — Chin Med J (Engl). 2021 Feb 17;134(6):699–707. doi: 10.1097/CM9.0000000000001133 (PMC7989993; doi:10.1097/cm9.0000000000001133), 2021-02-17
Supplement: cm9-134-699-s001.pdf [file cm9-134-699-s001.pdf]

Supplementary Table 1 DEGs related to autophagy between OGD/R+BM-MSC group and OGD/R group

| Genes           | <i>P</i> | Fold change | Regulation |
|-----------------|----------|-------------|------------|
| <i>Bnip3</i>    | 0.0044   | 4.03        | up         |
| <i>Plod2</i>    | 0.0052   | 3.68        | up         |
| <i>Hist1h3i</i> | 0.0242   | 3.57        | up         |
| <i>Atg9b</i>    | 0.0084   | 2.99        | down       |
| <i>Pfkp</i>     | 0.0060   | 2.54        | up         |
| <i>Bnip3l</i>   | 0.0231   | 2.53        | up         |
| <i>Arsb</i>     | 0.0003   | 2.48        | up         |
| <i>Wipi1</i>    | 0.0297   | 2.22        | up         |
| <i>Tspo</i>     | 0.0022   | 2.22        | up         |
| <i>Hilpda</i>   | 0.0328   | 2.20        | up         |
| <i>Mapk3</i>    | 0.0007   | 2.17        | up         |
| <i>Pim2</i>     | 0.0020   | 2.12        | up         |
| <i>Mefv</i>     | 0.0015   | 2.11        | up         |
| <i>Alkbh5</i>   | 0.0013   | 2.10        | up         |
| <i>HO-1</i>     | 0.0192   | 2.08        | up         |
| <i>Dap</i>      | 0.0080   | 2.06        | up         |
| <i>Wdr45b</i>   | 0.0356   | 2.06        | down       |
| <i>Eva1b</i>    | 0.0009   | 2.03        | up         |

BM-MSCs: bone marrow-derived mesenchymal stem cells; DEGs: differentially expressed genes; HO-1: heme oxygenase-1; OGD/R: oxygen-glucose deprivation/restoration.
